# Supplementary material for: Yearly Incidence of Stroke and Bleeding in Atrial Fibrillation with Concomitant Hyperthyroidism: A National Discharge Database Study
Source: MDPI journal article supplement (doi:10.3390/jcm11051342), 2022-02-28
Supplement: s1 [file s1]

*Supplementary tables and figure legends for :*

**Yearly incidence of stroke and bleeding in atrial fibrillation with concomitant hyperthyroidism: A national discharge database study**

Juqian ZHANG, Arnaud BISSON, Grégoire FAUCHIER, Alexandre BODIN, Julien HERBERT, Pierre Henri DUCLUZEAU, Gregory Y.H. LIP\*, Laurent FAUCHIER

**Supplementary Table S1.** Baseline characteristics of AF patients admitted to French hospitals (2010-2019) according to the presence and absence of concomitant hyperthyroidism in men (1a) and women (1b), respectively.

**1a. Baseline characteristics of men included in the study:**

|                                      | No<br>Hyperthyroidism<br>(n=1269048) | Hyperthyroidism<br>(n=12245) | p       | Total<br>(n=1281293) |
|--------------------------------------|--------------------------------------|------------------------------|---------|----------------------|
| Age (years), mean±SD                 | 74.4±12.3                            | 73.4±12.6                    | <0.0001 | 74.3±12.3            |
| Sex (male), n (%)                    | 1269048 (100.0)                      | 12245 (100.0)                | -       | 1281293 (100.0)      |
| CHA2DS2VASc score, mean±SD           | 2.9±1.6                              | 2.8±1.6                      | 0.05    | 2.9±1.6              |
| HASBLED score, mean±SD               | 2.4±1.3                              | 2.4±1.3                      | 0.15    | 2.4±1.3              |
| Charlson comorbidity index, mean±SD  | 3.6±3.0                              | 3.8±3.0                      | <0.0001 | 3.6±3.0              |
| Frailty index, mean±SD               | 8.4±8.8                              | 9.7±9.3                      | <0.0001 | 8.4±8.8              |
| Hypertension, n (%)                  | 723226 (57.0)                        | 6894 (56.3)                  | 0.13    | 730120 (57.0)        |
| Diabetes mellitus, n (%)             | 288790 (22.8)                        | 2873 (23.5)                  | 0.06    | 291663 (22.8)        |
| Heart failure with congestion, n (%) | 459038 (36.2)                        | 5125 (41.9)                  | <0.0001 | 464163 (36.2)        |
| History of pulmonary edema, n (%)    | 34161 (2.7)                          | 325 (2.7)                    | 0.8     | 34486 (2.7)          |
| Mitral regurgitation, n (%)          | 69322 (5.5)                          | 782 (6.4)                    | <0.0001 | 70104 (5.5)          |
| Aortic regurgitation, n (%)          | 32610 (2.6)                          | 285 (2.3)                    | 0.09    | 32895 (2.6)          |
| Aortic stenosis, n (%)               | 78004 (6.1)                          | 608 (5.0)                    | <0.0001 | 78612 (6.1)          |
| Previous endocarditis, n (%)         | 7263 (0.6)                           | 49 (0.4)                     | 0.01    | 7312 (0.6)           |
| Dilated cardiomyopathy, n (%)        | 103776 (8.2)                         | 1338 (10.9)                  | <0.0001 | 105114 (8.2)         |
| Coronary artery disease, n (%)       | 379467 (29.9)                        | 3491 (28.5)                  | 0.001   | 382958 (29.9)        |
| Previous MI, n (%)                   | 72306 (5.7)                          | 617 (5.0)                    | 0.002   | 72923 (5.7)          |
| Previous PCI, n (%)                  | 69346 (5.5)                          | 577 (4.7)                    | 0.0003  | 69923 (5.5)          |
| Previous CABG, n (%)                 | 63226 (5.0)                          | 514 (4.2)                    | 0.0001  | 63740 (5.0)          |
| Vascular disease, n (%)              | 275172 (21.7)                        | 2612 (21.3)                  | 0.35    | 277784 (21.7)        |
| Previous pacemaker or ICD, n (%)     | 60301 (4.8)                          | 606 (4.9)                    | 0.31    | 60907 (4.8)          |
| Ischemic stroke, n (%)               | 80099 (6.3)                          | 635 (5.2)                    | <0.0001 | 80734 (6.3)          |
| Intracranial bleeding, n (%)         | 27969 (2.2)                          | 242 (2.0)                    | 0.09    | 28211 (2.2)          |
| Smoker, n (%)                        | 127338 (10.0)                        | 1420 (11.6)                  | <0.0001 | 128758 (10.0)        |
| Dyslipidaemia, n (%)                 | 300815 (23.7)                        | 2686 (21.9)                  | <0.0001 | 303501 (23.7)        |
| Obesity, n (%)                       | 187577 (14.8)                        | 1714 (14.0)                  | 0.02    | 189291 (14.8)        |
| Alcohol related diagnoses, n (%)     | 96808 (7.6)                          | 882 (7.2)                    | 0.08    | 97690 (7.6)          |
| Abnormal renal function, n (%)       | 87379 (6.9)                          | 961 (7.8)                    | <0.0001 | 88340 (6.9)          |
| Lung disease, n (%)                  | 236597 (18.6)                        | 2605 (21.3)                  | <0.0001 | 239202 (18.7)        |
| Sleep apnoea syndrome, n (%)         | 90273 (7.1)                          | 832 (6.8)                    | 0.17    | 91105 (7.1)          |
| COPD, n (%)                          | 153906 (12.1)                        | 1789 (14.6)                  | <0.0001 | 155695 (12.2)        |
| Liver disease, n (%)                 | 54959 (4.3)                          | 536 (4.4)                    | 0.8     | 55495 (4.3)          |
| History of hypothyroidism, n (%)     | 43027 (3.4)                          | 609 (5.0)                    | <0.0001 | 43636 (3.4)          |
| Inflammatory disease, n (%)          | 72825 (5.7)                          | 746 (6.1)                    | 0.09    | 73571 (5.7)          |
| Anaemia, n (%)                       | 204378 (16.1)                        | 2129 (17.4)                  | 0.0001  | 206507 (16.1)        |
| Previous cancer, n (%)               | 266767 (21.0)                        | 2452 (20.0)                  | 0.01    | 269219 (21.0)        |

Values are n (%) or mean±SD. CABG: coronary artery bypass graft; COPD: chronic obstructive pulmonary disease; MI: myocardial infarction; ICD: implantable cardioverter defibrillator; PCI: percutaneous coronary intervention; SD: standard deviation.

**1b. Baseline characteristics of women included in the study:**

|                                      | No<br>Hyperthyroidism<br>(n=1119639) | Hyperthyroidism<br>(n=20155) | p       | Total<br>(n=1139794) |
|--------------------------------------|--------------------------------------|------------------------------|---------|----------------------|
| Age (years), mean±SD                 | 80.4±10.9                            | 79.2±11.9                    | <0.0001 | 80.4±11.0            |
| Sex (male), n (%)                    | 0 (0.0)                              | 0 (0.0)                      | -       | 0 (0.0)              |
| CHA2DS2VASc score, mean±SD           | 4.1±1.4                              | 4.1±1.4                      | <0.0001 | 4.1±1.4              |
| HASBLED score, mean±SD               | 2.4±1.1                              | 2.3±1.1                      | <0.0001 | 2.4±1.1              |
| Charlson comorbidity index, mean±SD  | 3.2±2.6                              | 3.2±2.5                      | 0.04    | 3.2±2.6              |
| Frailty index, mean±SD               | 10.2±9.4                             | 10.9±9.5                     | <0.0001 | 10.2±9.4             |
| Hypertension, n (%)                  | 705035 (63.0)                        | 12602 (62.5)                 | 0.2     | 717637 (63.0)        |
| Diabetes mellitus, n (%)             | 209782 (18.7)                        | 3833 (19.0)                  | 0.31    | 213615 (18.7)        |
| Heart failure with congestion, n (%) | 402535 (36.0)                        | 8109 (40.2)                  | <0.0001 | 410644 (36.0)        |
| History of pulmonary edema, n (%)    | 24915 (2.2)                          | 400 (2.0)                    | 0.02    | 25315 (2.2)          |
| Mitral regurgitation, n (%)          | 70174 (6.3)                          | 1398 (6.9)                   | 0.0001  | 71572 (6.3)          |
| Aortic regurgitation, n (%)          | 25720 (2.3)                          | 522 (2.6)                    | 0.01    | 26242 (2.3)          |
| Aortic stenosis, n (%)               | 68764 (6.1)                          | 1134 (5.6)                   | 0.003   | 69898 (6.1)          |
| Previous endocarditis, n (%)         | 3274 (0.3)                           | 61 (0.3)                     | 0.79    | 3335 (0.3)           |
| Dilated cardiomyopathy, n (%)        | 60850 (5.4)                          | 1382 (6.9)                   | <0.0001 | 62232 (5.5)          |
| Coronary artery disease, n (%)       | 205474 (18.4)                        | 3307 (16.4)                  | <0.0001 | 208781 (18.3)        |
| Previous MI, n (%)                   | 44530 (4.0)                          | 737 (3.7)                    | 0.02    | 45267 (4.0)          |
| Previous PCI, n (%)                  | 26005 (2.3)                          | 401 (2.0)                    | 0.002   | 26406 (2.3)          |
| Previous CABG, n (%)                 | 15227 (1.4)                          | 199 (1.0)                    | <0.0001 | 15426 (1.4)          |
| Vascular disease, n (%)              | 144243 (12.9)                        | 2391 (11.9)                  | <0.0001 | 146634 (12.9)        |
| Previous pacemaker or ICD, n (%)     | 32034 (2.9)                          | 392 (1.9)                    | <0.0001 | 32426 (2.8)          |
| Ischemic stroke, n (%)               | 90184 (8.1)                          | 1318 (6.5)                   | <0.0001 | 91502 (8.0)          |
| Intracranial bleeding, n (%)         | 23527 (2.1)                          | 340 (1.7)                    | <0.0001 | 23867 (2.1)          |
| Smoker, n (%)                        | 31815 (2.8)                          | 716 (3.6)                    | <0.0001 | 32531 (2.9)          |
| Dyslipidaemia, n (%)                 | 212917 (19.0)                        | 3421 (17.0)                  | <0.0001 | 216338 (19.0)        |
| Obesity, n (%)                       | 152002 (13.6)                        | 2460 (12.2)                  | <0.0001 | 154462 (13.6)        |
| Alcohol related diagnoses, n (%)     | 23433 (2.1)                          | 326 (1.6)                    | <0.0001 | 23759 (2.1)          |
| Abnormal renal function, n (%)       | 75171 (6.7)                          | 1304 (6.5)                   | 0.17    | 76475 (6.7)          |
| Lung disease, n (%)                  | 156990 (14.0)                        | 2853 (14.2)                  | 0.59    | 159843 (14.0)        |
| Sleep apnoea syndrome, n (%)         | 34396 (3.1)                          | 491 (2.4)                    | <0.0001 | 34887 (3.1)          |
| COPD, n (%)                          | 69337 (6.2)                          | 1274 (6.3)                   | 0.45    | 70611 (6.2)          |
| Liver disease, n (%)                 | 31827 (2.8)                          | 569 (2.8)                    | 0.87    | 32396 (2.8)          |
| History of hypothyroidism, n (%)     | 125424 (11.2)                        | 1941 (9.6)                   | <0.0001 | 127365 (11.2)        |
| Inflammatory disease, n (%)          | 68979 (6.2)                          | 1208 (6.0)                   | 0.33    | 70187 (6.2)          |
| Anaemia, n (%)                       | 199723 (17.8)                        | 3518 (17.5)                  | 0.16    | 203241 (17.8)        |
| Previous cancer, n (%)               | 153310 (13.7)                        | 2391 (11.9)                  | <0.0001 | 155701 (13.7)        |

Values are n (%) or mean±SD. CABG: coronary artery bypass graft; COPD: chronic obstructive pulmonary disease; MI: myocardial infarction; ICD: implantable cardioverter defibrillator; PCI: percutaneous coronary intervention; SD: standard deviation.

**Supplementary Table S2.** Yearly incidence of stroke in AF patients stratified by sex, presence or absence of concomitant hyperthyroidism and the CHA<sub>2</sub>DS<sub>2</sub>VASc score.

| CHA <sub>2</sub> DS <sub>2</sub> VASc score | All patients, hyperthyroidism | All patients, no hyperthyroidism | Men, hyperthyroidism | Men, no hyperthyroidism | Women, hyperthyroidism | Women, no hyperthyroidism |
|---------------------------------------------|-------------------------------|----------------------------------|----------------------|-------------------------|------------------------|---------------------------|
| Whole follow-up:                            |                               |                                  |                      |                         |                        |                           |
| 0                                           | 0.5 (0.3-0.9)                 | 0.7 (0.6-0.7)                    | 0.5 (0.3-0.9)        | 0.7 (0.6-0.7)           | -                      | -                         |
| 1                                           | 0.8 (0.6-1.1)                 | 0.9 (0.9-0.9)                    | 0.7 (0.5-1.0)        | 1.0 (1.0-1.0)           | 0.9 (0.6-1.4)          | 0.6 (0.6-0.7)             |
| 2                                           | 1.4 (1.2-1.6)                 | 1.4 (1.4-1.5)                    | 1.5 (1.3-1.9)        | 1.6 (1.5-1.6)           | 1.1 (0.8-1.5)          | 1.0 (1.0-1.0)             |
| 3                                           | 2.2 (2.0-2.4)                 | 2.0 (2.0-2.1)                    | 1.9 (1.6-2.3)        | 2.0 (2.0-2.0)           | 2.4 (2.1-2.8)          | 2.1 (2.0-2.1)             |
| 4                                           | 3.2 (2.9-3.4)                 | 2.6 (2.6-2.6)                    | 2.9 (2.4-3.4)        | 2.6 (2.5-2.6)           | 3.3 (2.9-3.6)          | 2.6 (2.6-2.7)             |
| 5                                           | 3.7 (3.3-4.1)                 | 3.4 (3.4-3.5)                    | 4.3 (3.4-5.3)        | 3.5 (3.5-3.6)           | 3.5 (3.1-4.0)          | 3.4 (3.3-3.4)             |
| 6                                           | 5.1 (4.4-5.9)                 | 5.3 (5.2-5.3)                    | 4.7 (3.3-6.7)        | 5.8 (5.6-5.9)           | 5.2 (4.5-6.1)          | 5.1 (5.0-5.2)             |
| 7                                           | 7.5 (5.9-9.5)                 | 8.0 (7.7-8.2)                    | 13.5 (7.3-25.2)      | 10.2 (9.6-10.8)         | 6.9 (5.4-9.0)          | 7.5 (7.2-7.7)             |
| 8                                           | 16.6 (11.2-24.6)              | 11.3 (10.7-11.9)                 | -                    | 10.3 (9.1-11.5)         | 14.0 (8.9-21.9)        | 11.6 (10.9-12.3)          |
| 9                                           | 15.9 (4.0-63.8)               | 13.2 (11.6-15.0)                 | -                    | -                       | 15.9 (4.0-63.8)        | 13.2 (11.6-15.0)          |
| Total                                       | 2.6 (2.5-2.8)                 | 2.3 (2.3-2.4)                    | 2.0 (1.8-2.2)        | 2.0 (2.0-2.0)           | 3.1 (2.9-3.3)          | 2.8 (2.8-2.8)             |

**Supplementary Table S3.** Hazard ratios for the association between hyperthyroidism and ischaemic stroke during 1) whole follow-up, 2) first year of follow-up after concomitant diagnoses of AF and hyperthyroidism, and 3) beyond the first year of follow-up.

|                                                           | Whole FU            | Day 1-365           | After Day 365       |
|-----------------------------------------------------------|---------------------|---------------------|---------------------|
| CHA <sub>2</sub> DS <sub>2</sub> VASc score, all patients |                     |                     |                     |
| 0-1                                                       | 0.851 (0.663-1.093) | 0.992 (0.638-1.542) | 0.797 (0.588-1.081) |
| 2                                                         | 0.957 (0.806-1.137) | 1.136 (0.862-1.498) | 0.871 (0.700-1.084) |
| 3                                                         | 1.074 (0.961-1.201) | 1.106 (0.921-1.328) | 1.056 (0.918-1.216) |
| 4                                                         | 1.206 (1.105-1.317) | 1.318 (1.154-1.505) | 1.131 (1.006-1.272) |
| 5                                                         | 1.068 (0.963-1.183) | 1.144 (0.991-1.321) | 0.999 (0.863-1.156) |
| 6-9                                                       | 0.990 (0.881-1.113) | 1.035 (0.893-1.200) | 0.923 (0.763-1.118) |
| Total                                                     | 1.114 (1.061-1.169) | 1.203 (1.120-1.291) | 1.047 (0.980-1.118) |
| CHA <sub>2</sub> DS <sub>2</sub> VASc score, Men          |                     |                     |                     |
| 0-1                                                       | 0.728 (0.535-0.990) | 0.907 (0.536-1.535) | 0.661 (0.452-0.965) |
| 2                                                         | 0.989 (0.806-1.213) | 1.125 (0.806-1.569) | 0.921 (0.711-1.193) |
| 3                                                         | 0.951 (0.794-1.139) | 1.131 (0.865-1.478) | 0.840 (0.658-1.072) |
| 4                                                         | 1.120 (0.943-1.329) | 1.253 (0.986-1.591) | 1.006 (0.787-1.287) |
| 5-8                                                       | 1.094 (0.916-1.306) | 1.227 (0.988-1.523) | 0.893 (0.654-1.219) |
| Total                                                     | 0.986 (0.903-1.076) | 1.159 (1.024-1.312) | 0.857 (0.758-0.970) |
| CHA <sub>2</sub> DS <sub>2</sub> VASc score, Women        |                     |                     |                     |
| 1-2                                                       | 1.180 (0.913-1.524) | 1.500 (0.981-2.294) | 1.050 (0.761-1.448) |
| 3                                                         | 1.157 (1.004-1.334) | 1.100 (0.855-1.414) | 1.187 (0.999-1.410) |
| 4                                                         | 1.238 (1.118-1.372) | 1.393 (1.187-1.634) | 1.149 (1.005-1.313) |
| 5                                                         | 1.046 (0.932-1.175) | 1.140 (0.965-1.347) | 0.972 (0.828-1.141) |
| 6-9                                                       | 1.007 (0.887-1.144) | 1.026 (0.870-1.210) | 0.980 (0.802-1.198) |
| Total                                                     | 1.100 (1.038-1.166) | 1.150 (1.054-1.254) | 1.063 (0.983-1.149) |

Hazard ratios are for hyperthyroidism vs. no hyperthyroidism. FU: follow-up.
